# Supplementary material for: Cost-Effectiveness of IDegLira Versus Insulin Intensification Regimens for the Treatment of Adults with Type 2 Diabetes in the Czech Republic
Source: Springer Nature journal article supplement (doi:10.1007/s13300-017-0323-y), 2017-10-23
Supplement: MOESM1 [file 15159606]

## Supplementary Appendix

**Table S1: Annual per patient management costs**

| Patient management                            | Annual cost (CZK) |
|-----------------------------------------------|-------------------|
| Aspirin                                       | 192               |
| Statins                                       | 2,444             |
| ACE inhibitors                                | 226               |
| Microalbuminuria screening                    | 481               |
| Gross proteinuria screening                   | 481               |
| Stopping ACE inhibitors due to adverse events | 482               |
| Screening for eye disease                     | 1,698             |
| Screening for diabetic foot complications     | 1,190             |

Abbreviations: ACE, angiotensin-converting enzyme; CZK, Czech Koruna

**Table S2: Cost of treating diabetes related complications**

| <b>Complication</b>                     | <b>Cost (CZK)</b> |
|-----------------------------------------|-------------------|
| Myocardial infarction, year of event    | 99,154            |
| Myocardial infarction, years 2+         | 10,300            |
| Angina, year of onset                   | 26,299            |
| Angina, years 2+                        | 9,946             |
| Congestive heart failure, year of onset | 59,869            |
| Congestive heart failure, years 2+      | 30,677            |
| Stroke, year of event                   | 61,163            |
| Stroke, years 2+                        | 14,174            |
| Stroke, death within 30 days            | 48,537            |
| Peripheral vascular disease, onset      | 61,446            |
| Peripheral vascular disease, years 2+   | 985               |
| Haemodialysis, onset                    | 1,167,769         |
| Haemodialysis, years 2+                 | 1,127,322         |
| Peritoneal dialysis, onset              | 674,405           |
| Peritoneal dialysis, years 2+           | 636,421           |
| Kidney transplant, first year           | 566,301           |
| Kidney transplant, years 2+             | 351,932           |
| Non-severe hypoglycaemia                | 0*                |
| Severe hypoglycaemia                    | 17,676            |
| Laser treatment                         | 813               |
| Cataract operation                      | 9,765             |
| Blindness, first year                   | 5,908             |
| Blindness, years 2+                     | 5,908             |
| Neuropathy, year of onset               | 13,426            |
| Neuropathy, years 2+                    | 13,426            |
| Amputation, procedure                   | 172,177           |
| Amputation, prosthesis                  | 25,800            |
| Gangrene treatment                      | 50,861            |
| Infected foot ulcer                     | 10,438            |
| Uninfected foot ulcer                   | 4,319             |

\*assumed; CZK, Czech Koruna

**Table S3 IDegLira versus basal-bolus therapy: Sensitivity analysis results**

|                                                                                                    | <b>Δ Cost<br/>(CZK)</b> | <b>Δ QALYs</b> | <b>ICER (CZK<br/>per QALY<br/>gained)</b> |
|----------------------------------------------------------------------------------------------------|-------------------------|----------------|-------------------------------------------|
| <b>Base case</b>                                                                                   | <b>107,829</b>          | <b>+0.31</b>   | <b>345,052</b>                            |
| 20 year time horizon [ <i>base case 50 years</i> ]                                                 | 103,377                 | +0.31          | 337,503                                   |
| 10 year time horizon [ <i>base case 50 years</i> ]                                                 | 102,645                 | +0.25          | 413,391                                   |
| Discount rate 0% [ <i>base case 3% years</i> ]                                                     | 119,545                 | +0.40          | 296,784                                   |
| Discount rate 5% [ <i>base case 3% years</i> ]                                                     | 101,445                 | +0.27          | 371,184                                   |
| HbA <sub>1c</sub> difference abolished                                                             | 110,937                 | +0.26          | 419,898                                   |
| Systolic blood pressure difference abolished                                                       | 108,618                 | +0.29          | 374,416                                   |
| Lipid difference abolished                                                                         | 104,833                 | +0.30          | 354,214                                   |
| BMI difference abolished                                                                           | 105,410                 | +0.22          | 479,571                                   |
| Hypoglycaemia difference abolished                                                                 | 111,605                 | +0.20          | 563,662                                   |
| Statistically significant differences only                                                         | 111,270                 | +0.32          | 348,373                                   |
| HbA <sub>1c</sub> benefit maintained                                                               | 103,639                 | +0.40          | 259,552                                   |
| UKPDS HbA <sub>1c</sub> creep                                                                      | 106,351                 | +0.33          | 324,141                                   |
| Upper 95% CI of HbA <sub>1c</sub> change in IDegLira arm                                           | 110,017                 | +0.34          | 328,310                                   |
| Lower 95% CI of HbA <sub>1c</sub> change in IDegLira arm                                           | 109,733                 | +0.30          | 366,999                                   |
| BMI benefit maintained after treatment switch [ <i>base case BMI benefit abolished on switch</i> ] | 107,749                 | +0.37          | 288,408                                   |
| Treatment switch at 3 years in IDegLira arm [ <i>base case 5 years</i> ]                           | 68,773                  | +0.24          | 287,274                                   |
| Treatment switch at 7 years in IDegLira arm [ <i>base case 5 years</i> ]                           | 141,089                 | +0.40          | 352,018                                   |
| No treatment switch [ <i>base case 5 years</i> ]                                                   | 339,137                 | +0.83          | 410,876                                   |
| NPH cost applied [ <i>base case IGlax U100 cost</i> ]                                              | 144,293                 | +0.31          | 461,738                                   |
| Defined daily doses in IGlax + 3x IAsp arm                                                         | 164,423                 | +0.31          | 526,154                                   |
| Observed doses in both arms                                                                        | 152,823                 | +0.31          | 489,034                                   |
| Two SMBG tests per day in the IGlax plus 3x IAsp arm                                               | 116,176                 | +0.31          | 371,763                                   |
| Cost of complications +10%                                                                         | 107,077                 | +0.31          | 342,646                                   |
| Cost of complications –10%                                                                         | 110,631                 | +0.31          | 354,019                                   |
| Alternative hypoglycaemia disutilities                                                             | 107,829                 | +0.28          | 381,290                                   |
| UKPDS 82 equations used                                                                            | 110,129                 | +0.32          | 343,831                                   |

Abbreviations: BMI, body mass index; CZK, Czech Koruna; ICER, incremental cost-effectiveness ratio; NPH, Neutral protamine Hagedorn; QALY, quality adjusted life year; SMBG, self measured blood glucose; UKPDS, UK Prospective Diabetes Study

**Table S4: Sensitivity analysis results – scenario analysis (IDegLira vs liraglutide added to basal insulin)**

|                                                                                                    | <b>Δ Cost (CZK)</b> | <b>Δ QALYs</b> | <b>ICER (CZK per QALY gained)</b> |
|----------------------------------------------------------------------------------------------------|---------------------|----------------|-----------------------------------|
| <b>Base case</b>                                                                                   | <b>33,231</b>       | <b>+0.05</b>   | <b>693,763</b>                    |
| 20 year time horizon [ <i>base case 50 years</i> ]                                                 | 33,930              | +0.04          | 909,643                           |
| 10 year time horizon [ <i>base case 50 years</i> ]                                                 | 30,513              | +0.01          | 2,773,873                         |
| Discount rate 0% [ <i>base case 3% years</i> ]                                                     | 36,236              | +0.08          | 431,385                           |
| Discount rate 5% [ <i>base case 3% years</i> ]                                                     | 31,484              | +0.03          | 931,492                           |
| HbA <sub>1c</sub> difference abolished                                                             | 35,758              | +0.003         | 11,174,291                        |
| Systolic blood pressure difference abolished                                                       | 34,337              | +0.04          | 843,656                           |
| Lipid difference abolished                                                                         | 32,807              | +0.05          | 705,530                           |
| BMI difference abolished                                                                           | 35,008              | +0.06          | 566,480                           |
| Hypoglycaemia difference abolished                                                                 | 30,252              | +0.06          | 503,362                           |
| Statistically significant differences only                                                         | 29,107              | +0.07          | 415,817                           |
| HbA <sub>1c</sub> benefit maintained                                                               | 29,703              | +0.14          | 211,262                           |
| UKPDS HbA <sub>1c</sub> creep                                                                      | 31,695              | +0.04          | 744,017                           |
| Upper 95% CI of HbA <sub>1c</sub> change in IDegLira arm                                           | 37,184              | +0.07          | 559,157                           |
| Lower 95% CI of HbA <sub>1c</sub> change in IDegLira arm                                           | 34,786              | +0.04          | 871,818                           |
| BMI benefit maintained after treatment switch [ <i>base case BMI benefit abolished on switch</i> ] | 32,823              | +0.03          | 1,083,262                         |
| Treatment switch at 3 years in IDegLira arm [ <i>base case 5 years</i> ]                           | 20,900              | +0.06          | 360,962                           |
| Treatment switch at 7 years in IDegLira arm [ <i>base case 5 years</i> ]                           | 42,133              | +0.05          | 936,291                           |
| No treatment switch [ <i>base case 5 years</i> ]                                                   | 106,038             | +0.10          | 1,102,265                         |
| NPH cost applied [ <i>base case IGlax U100 cost</i> ]                                              | 52,029              | +0.05          | 1,086,208                         |
| Defined daily doses in IGlax + 3x IAsp arm                                                         | 89,412              | +0.05          | 1,866,633                         |
| Observed doses in both arms                                                                        | 77,858              | +0.05          | 1,625,427                         |
| Cost of complications +20%                                                                         | 33,207              | +0.05          | 693,254                           |
| Cost of complications –20%                                                                         | 33,256              | +0.05          | 694,272                           |
| Alternative hypoglycaemia disutilities                                                             | 33,231              | +0.05          | 618,832                           |
| UKPDS 82 equations used                                                                            | 30,879              | +0.04          | 882,248                           |

Abbreviations: BMI, body mass index; CZK, Czech Koruna; ICER, incremental cost-effectiveness ratio; NPH, Neutral protamine Hagedorn; QALY, quality adjusted life year; SMBG, self measured blood glucose; UKPDS, UK Prospective Diabetes Study
